# Supplementary material for: Analysis of Longitudinal‐Ordered Categorical Data for Muscle Spasm Adverse Event of Vismodegib: Comparison Between Different Pharmacometric Models
Source: PubMed Central journal article supplement — CPT Pharmacometrics Syst Pharmacol. 2020 Jan 30;9(2):96–105. doi: 10.1002/psp4.12487 (PMC7020275; doi:10.1002/psp4.12487), 2020-01-30
Supplement: PSP4-9-96-s001.pdf [file PSP4-9-96-s001.pdf]

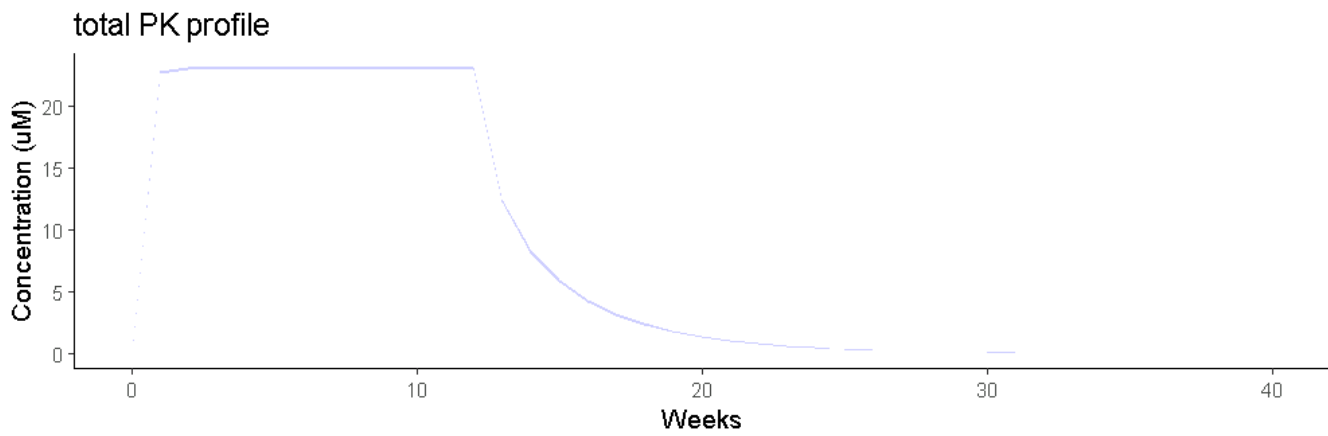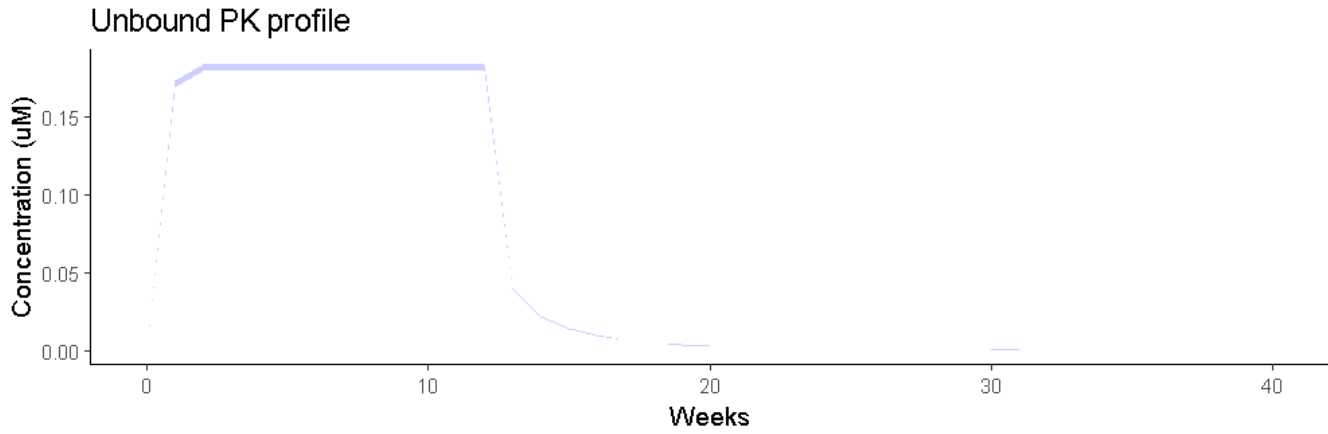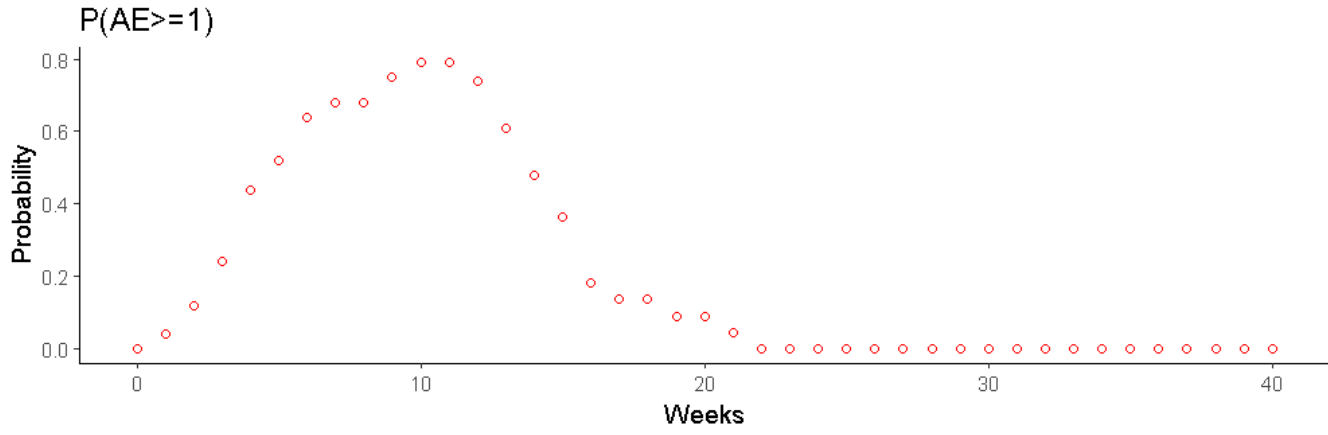

**Figure S1:** The simulation for the PK profiles of total and unbound vismodegib in the plasma was based on 150mg daily dose for 12-weeks with 24-weeks washout using the published popPK model. The actual age and body weight (from the 74 patients in the dataset), and the typical value of AAG ( $30 \mu\text{M}$ ) were used in the simulation as PK covariate; 500 simulations with 200 patients for each simulation (sampling with replacement from the 74 patients) were conducted. The shaded areas are the 95% prediction intervals. The observed proportion of grade  $\geq 1$  muscle spasm over time (red cycle) was from the cohort 2.
