# Supplementary material for: Analysis of Longitudinal‐Ordered Categorical Data for Muscle Spasm Adverse Event of Vismodegib: Comparison Between Different Pharmacometric Models
Source: PubMed Central journal article supplement — CPT Pharmacometrics Syst Pharmacol. 2020 Jan 30;9(2):96–105. doi: 10.1002/psp4.12487 (PMC7020275; doi:10.1002/psp4.12487), 2020-01-30
Supplement: PSP4-9-96-s002.pdf [file PSP4-9-96-s002.pdf]

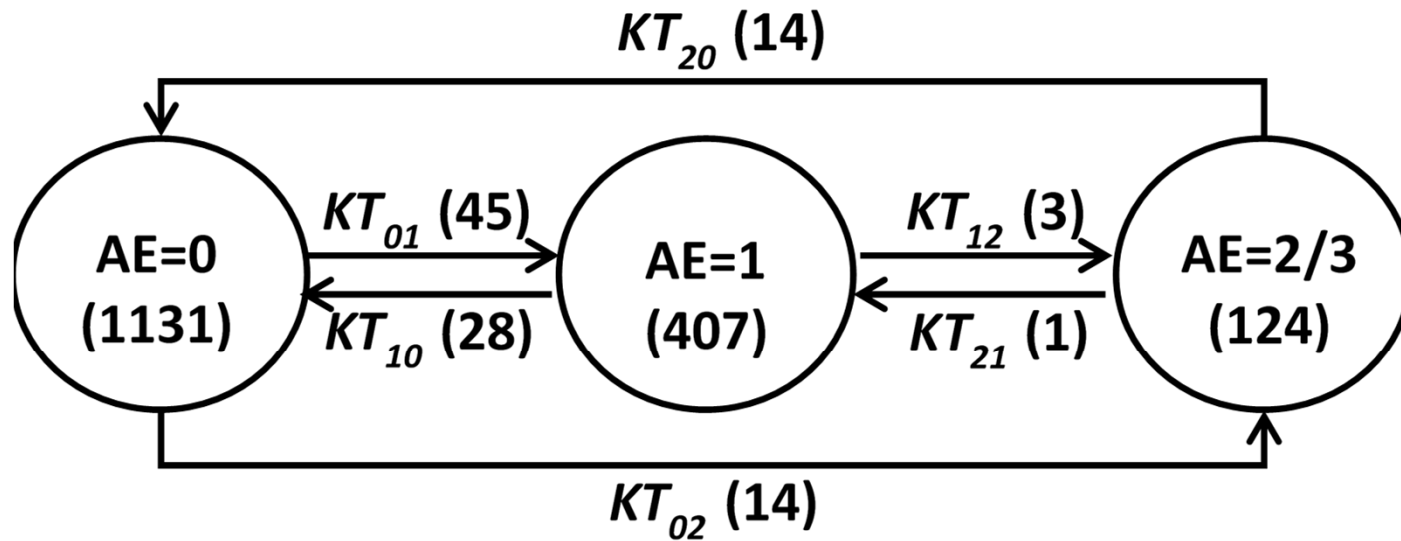

**Supplementary Figure S2: CTMM structure for muscle spasm adverse event.** Transitions between any two grades are modeled. The numbers in the parentheses are based on the weekly interval dataset. The observed total number of transitions are between two grades (displayed besides the lines) or within one grade (displayed in the circles).

CTMM, continuous-time Markov model; AE, adverse event;  $KT_{g_1g_2}$ , first-order transfer rate constant, with  $g_1$  as the preceding grade and  $g_2$  as the current grade.
