# Supplementary material for: Analysis of Longitudinal‐Ordered Categorical Data for Muscle Spasm Adverse Event of Vismodegib: Comparison Between Different Pharmacometric Models
Source: PubMed Central journal article supplement — CPT Pharmacometrics Syst Pharmacol. 2020 Jan 30;9(2):96–105. doi: 10.1002/psp4.12487 (PMC7020275; doi:10.1002/psp4.12487), 2020-01-30
Supplement: PSP4-9-96-s003.pdf [file PSP4-9-96-s003.pdf]

## a. Proportional Odds Model (PO)

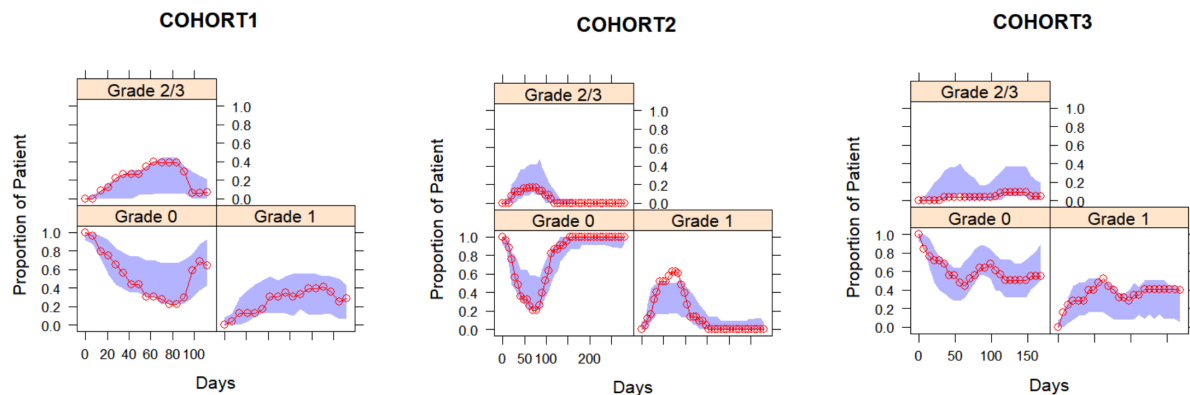

## b. Discrete-Time Markov Model (DTMM)

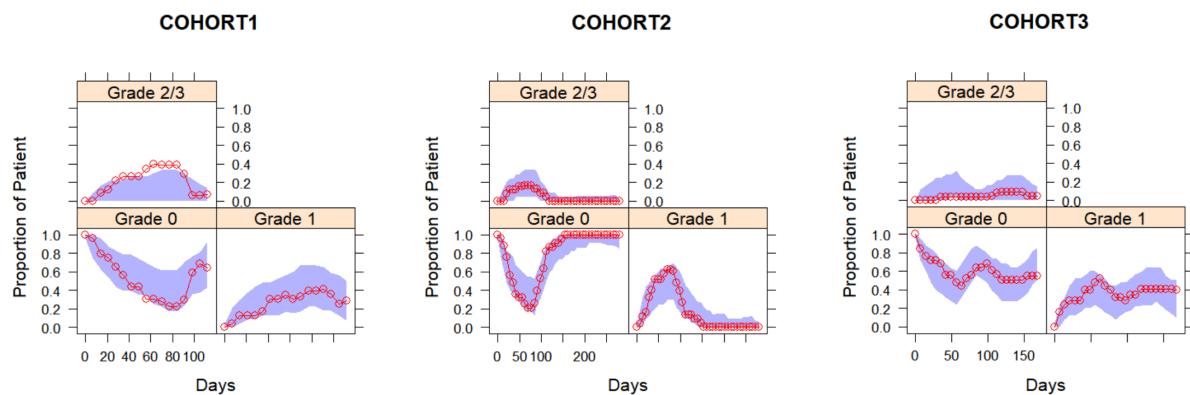

## c. Continuous-Time Markov Model (CTMM)

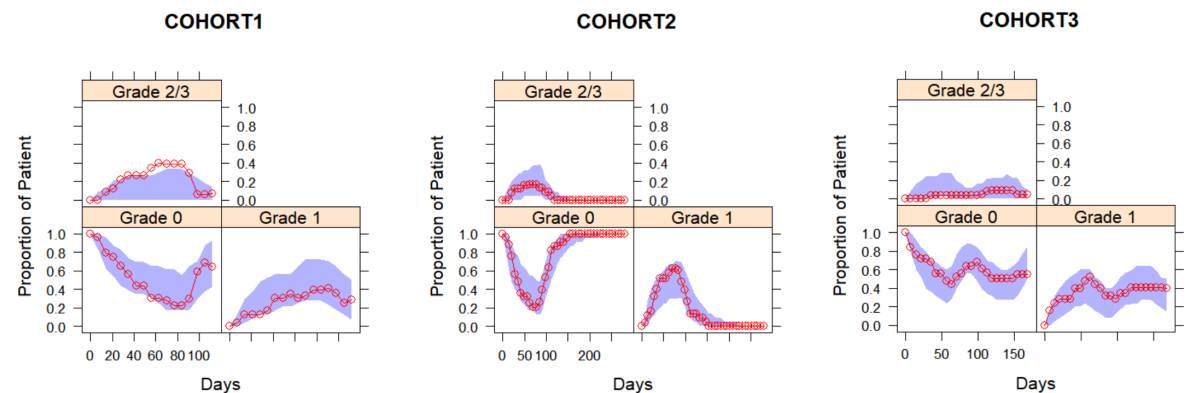

**Figure S3:** VPC for proportion of patients on each muscle spasm grade stratified by cohorts based on the weekly-spaced dataset. Circles are the observed proportion, shaded area are 95% confidence interval of model predictions.
