# Supplementary material for: Analysis of Longitudinal‐Ordered Categorical Data for Muscle Spasm Adverse Event of Vismodegib: Comparison Between Different Pharmacometric Models
Source: PubMed Central journal article supplement — CPT Pharmacometrics Syst Pharmacol. 2020 Jan 30;9(2):96–105. doi: 10.1002/psp4.12487 (PMC7020275; doi:10.1002/psp4.12487), 2020-01-30
Supplement: PSP4-9-96-s004.pdf [file PSP4-9-96-s004.pdf]

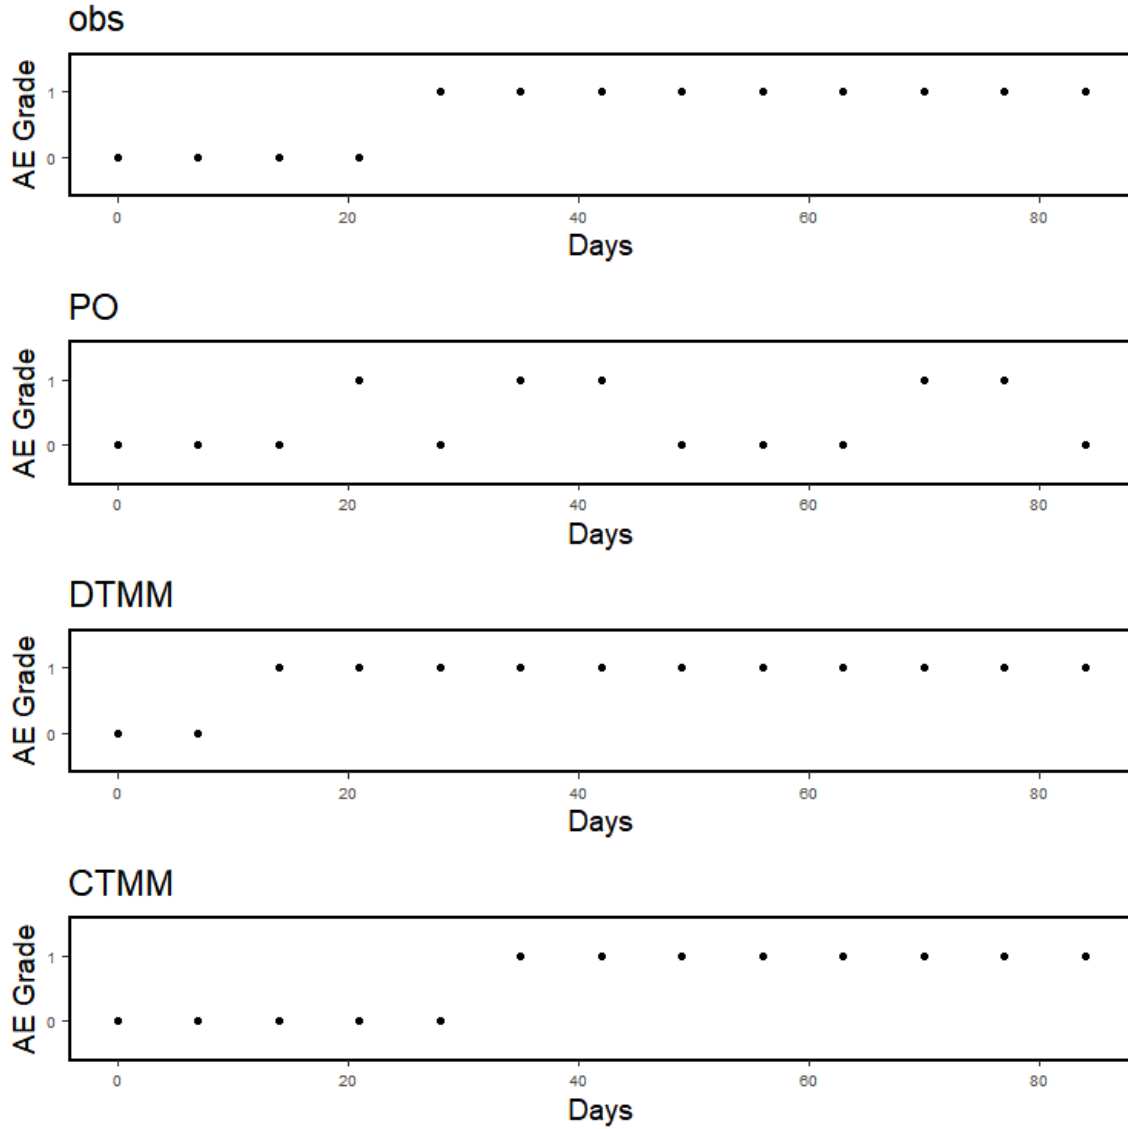

**Figure S4:** Observed and simulated muscle spasm time profile for a representative individual with 12-week daily treatment (150mg). The data frequency for the observed data and the simulations is weekly interval.

obs: observed data from a representative individual; PO – representative simulation from Proportional odds model; DTMM - representative simulation from Discrete-time Markov model; CTMM – representative simulation Continuous-time Markov model
