# Supplementary material for: Analysis of Longitudinal‐Ordered Categorical Data for Muscle Spasm Adverse Event of Vismodegib: Comparison Between Different Pharmacometric Models
Source: PubMed Central journal article supplement — CPT Pharmacometrics Syst Pharmacol. 2020 Jan 30;9(2):96–105. doi: 10.1002/psp4.12487 (PMC7020275; doi:10.1002/psp4.12487), 2020-01-30
Supplement: PSP4-9-96-s005.pdf [file PSP4-9-96-s005.pdf]

**a. Weekly interval:**

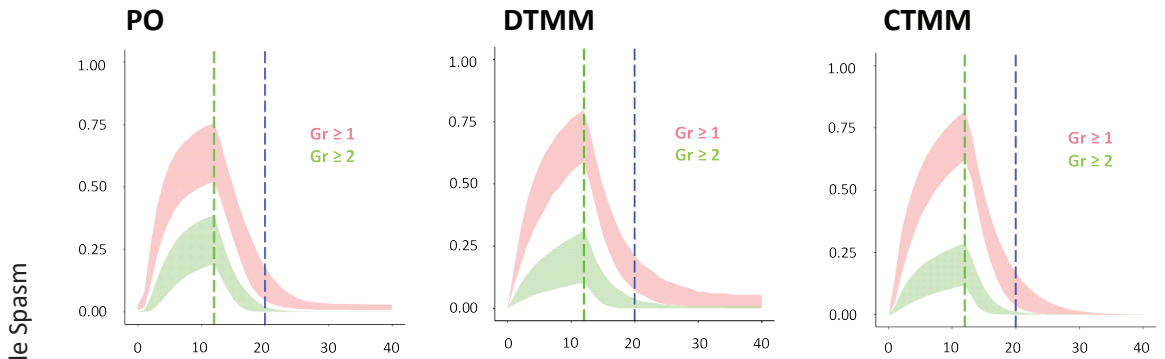

**b. Daily interval:**

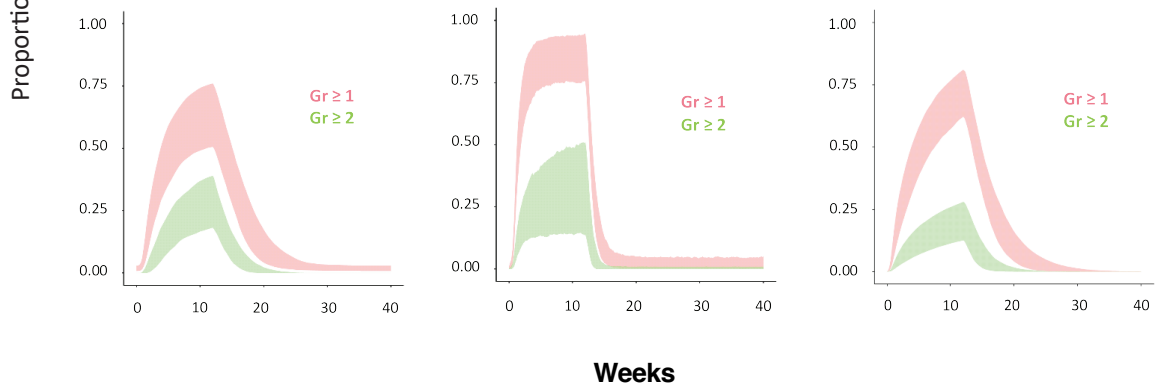

**Figure S5:** CTS for proportion of muscle spasm after 12-week daily treatment using models developed based on the weekly-spaced dataset.

Simulations included the Inter-individual variability and uncertainty of the parameters from non-parametric bootstrapping; 500 simulations with 200 patients for each simulation. The shaded areas are the 95% prediction intervals. The green and blue dash lines represent week 12 and week 20. The model was simulated for Muscle Spasm observed at frequency of a, weekly interval; b, daily interval. CTS - Clinical trial simulation; PO - Proportional odds model; DTMM - Discrete-time Markov model; CTMM - Continuous-time Markov model.
