# Supplementary material for: Analysis of Longitudinal‐Ordered Categorical Data for Muscle Spasm Adverse Event of Vismodegib: Comparison Between Different Pharmacometric Models
Source: PubMed Central journal article supplement — CPT Pharmacometrics Syst Pharmacol. 2020 Jan 30;9(2):96–105. doi: 10.1002/psp4.12487 (PMC7020275; doi:10.1002/psp4.12487), 2020-01-30
Supplement: PSP4-9-96-s006.pdf [file PSP4-9-96-s006.pdf]

### a. Weekly interval dataset

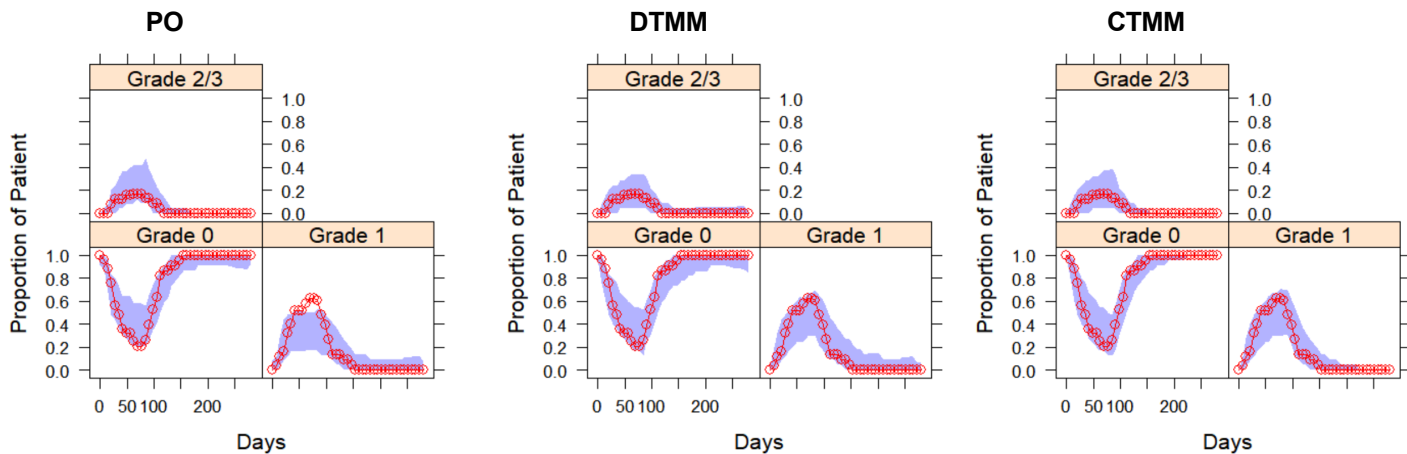

### b. Uneven interval dataset

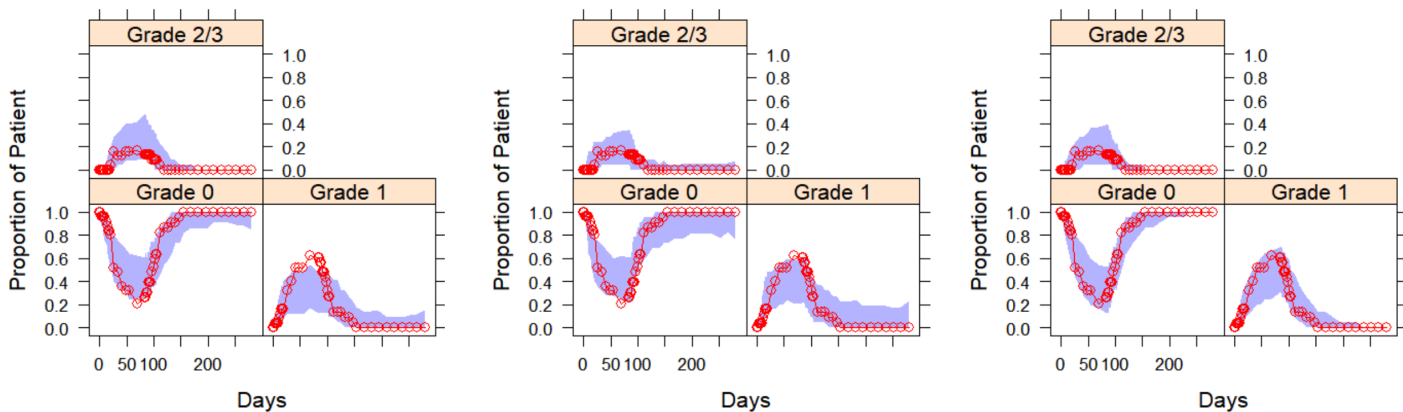

### c. Daily interval dataset

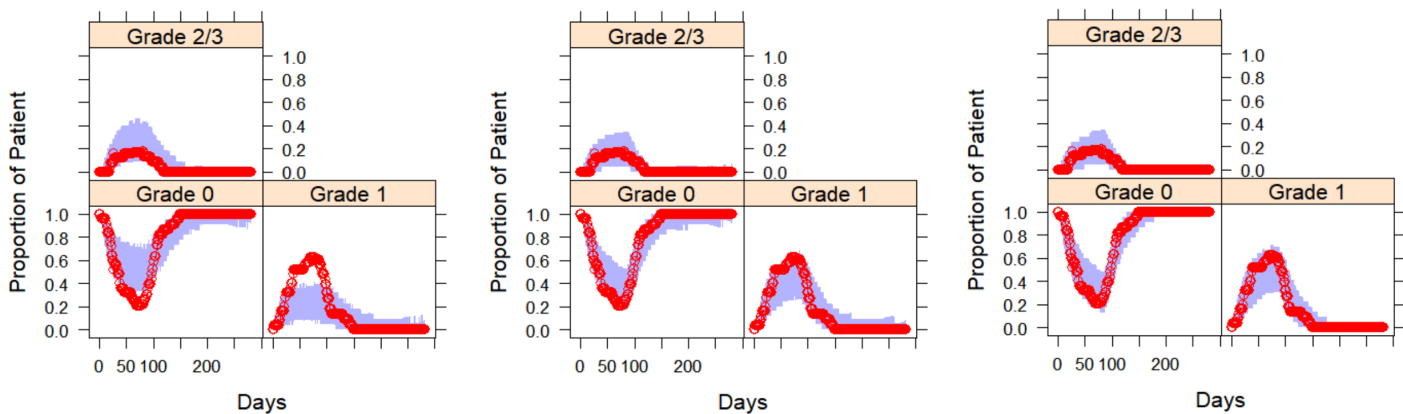

**Figure S6:** VPC for proportion of patients on each muscle spasm grade in cohort 2 based on dataset with different observation frequencies.

Models were fitted to weekly, daily or uneven interval datasets. Circles are the observed proportion, shaded area are 95% confidence interval of model predictions. PO - Proportional odds model; DTMM - Discrete-time Markov Model; CTMM - Continuous-time Markov Model.
